# Supplementary material
Source: Royal Society of Chemistry journal article supplement (doi:10.1039/d6bm00331a)
Supplement: d6bm00331a1.pdf [file d6bm00331a1.pdf]

Supporting information

## Regenerative cerium oxide nanozyme for cataract treatment via oxidative stress regulation

Hongying Xie, Yajia Wang, Jiahao Wang, Zhenbiao Xu, Chunyi Weng, Quankui Lin\*

National Engineering Research Center of Ophthalmology and Optometry, School of Biomedical Engineering, School of Ophthalmology and Optometry, Eye Hospital, Wenzhou Medical University, Wenzhou 325027, China

\*Correspondence author: [linqk@wmu.edu.cn](mailto:linqk@wmu.edu.cn)

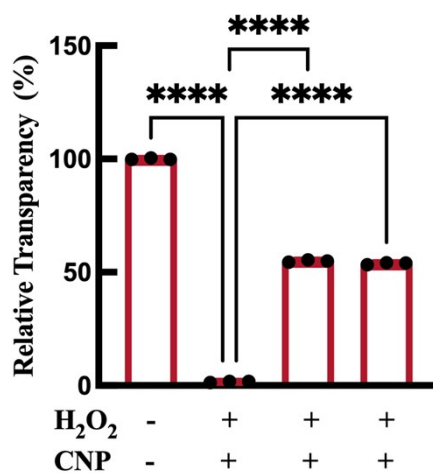

Figure S1. Relative Light Transparency of the Lens.
